# Supplementary material for: A large-gap quantum spin Hall state in exfoliated Na3Bi-like two-dimensional materials
Source: Royal Society of Chemistry journal article supplement (doi:10.1039/d2tc01755e), 2022-01-01
Supplement: d2tc01755e1.pdf [file d2tc01755e1.pdf]

## Supporting information

### **Large-gap quantum spin Hall state in exfoliated Na<sub>3</sub>Bi-like two-dimensional materials**

Jingwen Jiang<sup>a</sup>, Xiaoqiu Guo<sup>a</sup>, Zhuang Ma<sup>a</sup>, Gui Wang<sup>a</sup>, Yiguo Xu<sup>b</sup>, Xiuwen Zhang<sup>\*a§</sup>

*<sup>a</sup>Shenzhen Key Laboratory of Flexible Memory Materials and Devices, College of Physics and Optoelectronic Engineering, Shenzhen University, Shenzhen, 518060, China.*

*<sup>b</sup>Academy for Advanced Interdisciplinary Studies, Southern University of Science and Technology, Shenzhen 518055, China*

*Email: xiuwenzhang@szu.edu.cn*

*<sup>§</sup>Current address: Renewable and Sustainable Energy Institute, University of Colorado, Boulder, Colorado 80309, USA*

Table S1. Topological invariant ( $Z_2$ ) of monolayer and bilayer  $K_2NaBi$  and  $Rb_2NaBi$ .

| $Z_2$     | $K_2NaBi$ | $Rb_2NaBi$ |
|-----------|-----------|------------|
| Monolayer | 1         | 1          |
| Bilayer   | 0         | 0          |

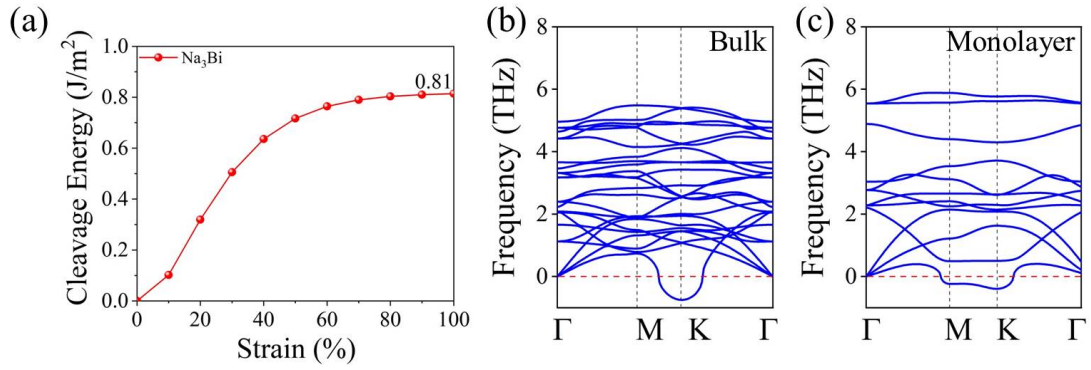

**Fig. S1** (a) The exfoliation energy of  $Na_3Bi$ , the strain is the percentage of stretch along the  $c$  axis. Phonon spectra of (b) bulk and (c) monolayer of  $Na_3Bi$ , show the bulk and monolayer structures are unstable with imaginary frequency phonon dispersion.

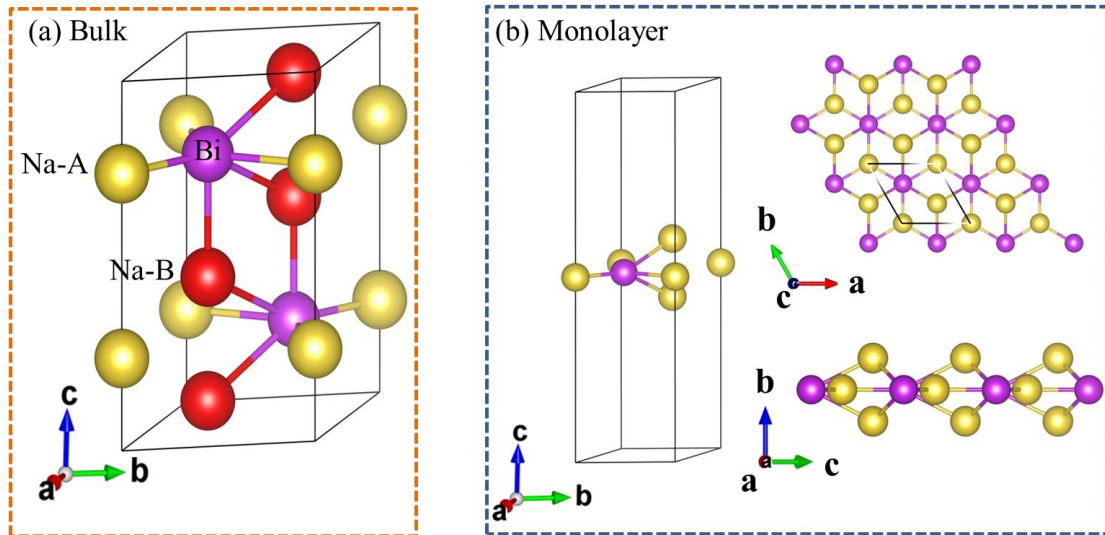

**Fig. S2** Schematic diagram of (a) bulk and (b) monolayer of Honeycomb ( $P6_3/mmc$ ) structure  $Na_3Bi$ .

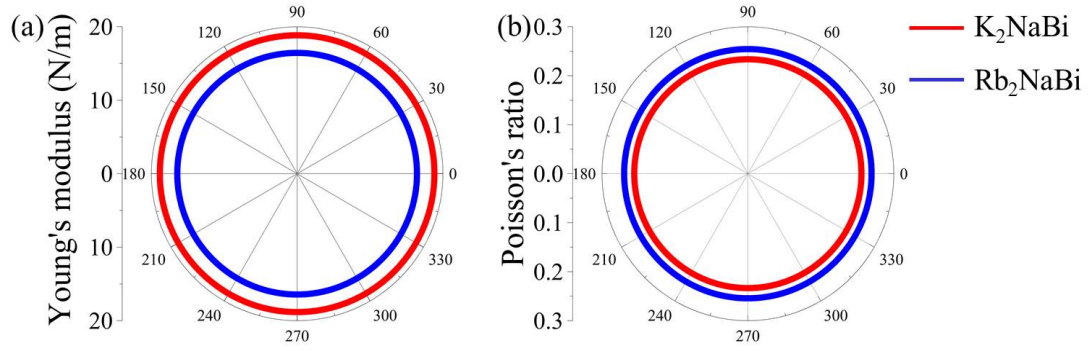

**Fig. S3** (a) Young's modulus  $Y_{2D}$  and (b) Poisson's ratio  $\nu$  of monolayer  $K_2NaBi$  and  $Rb_2NaBi$ .

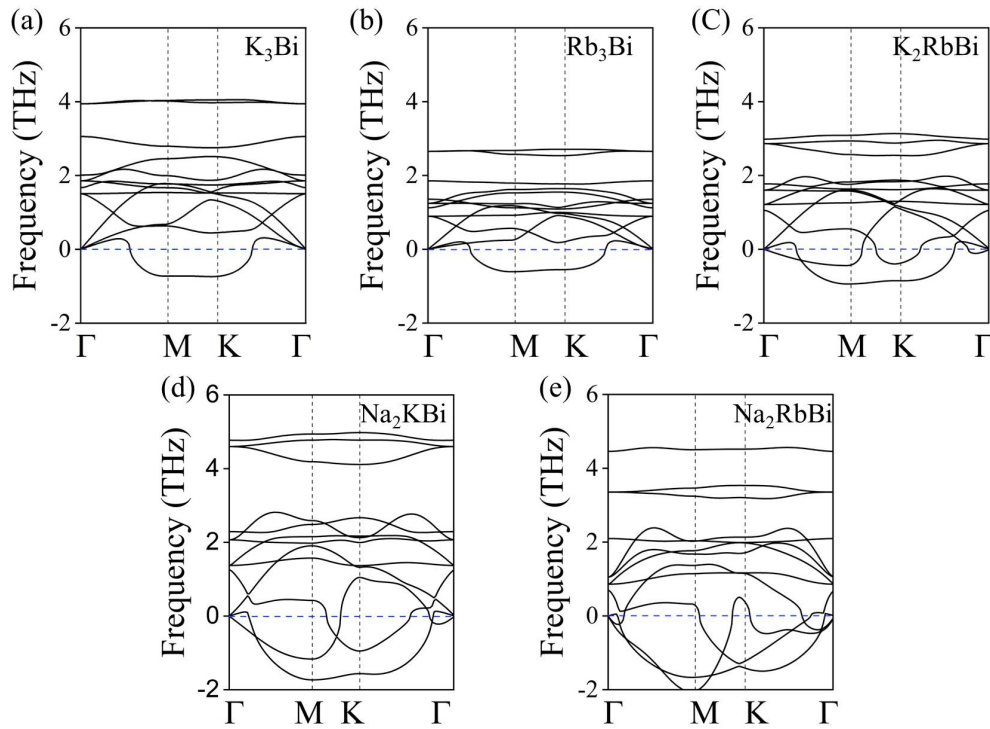

**Fig. S4** Phonon spectra of other  $Na_3Bi$ -like  $K_3Bi$ ,  $Rb_3Bi$ ,  $K_2RbBi$ ,  $Na_2KBi$  and  $Na_2RbBi$ , showing that these monolayer structures are dynamically unstable with imaginary frequency phonon dispersion.

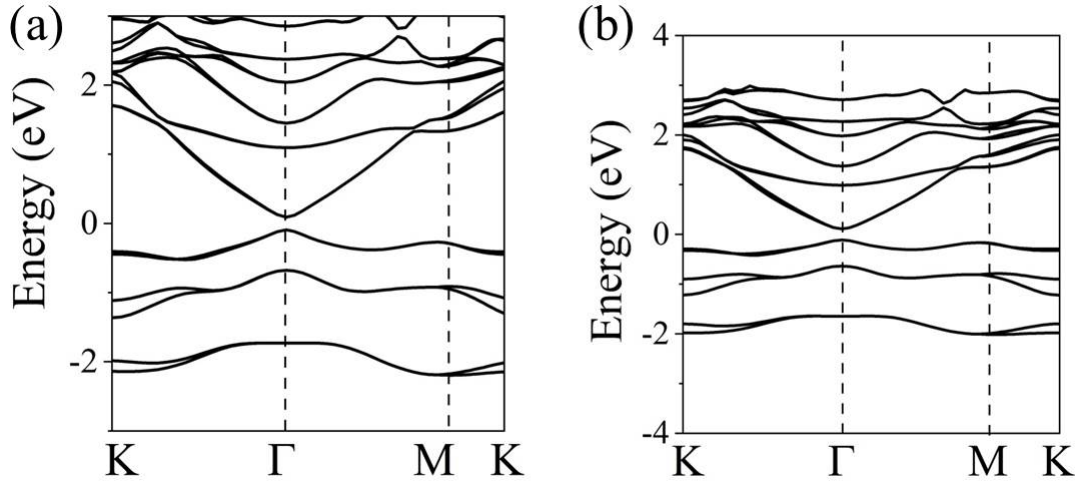

**Fig. S5** Band structure of (a)  $K_2NaBi$  and (b)  $Rb_2NaBi$  monolayer.

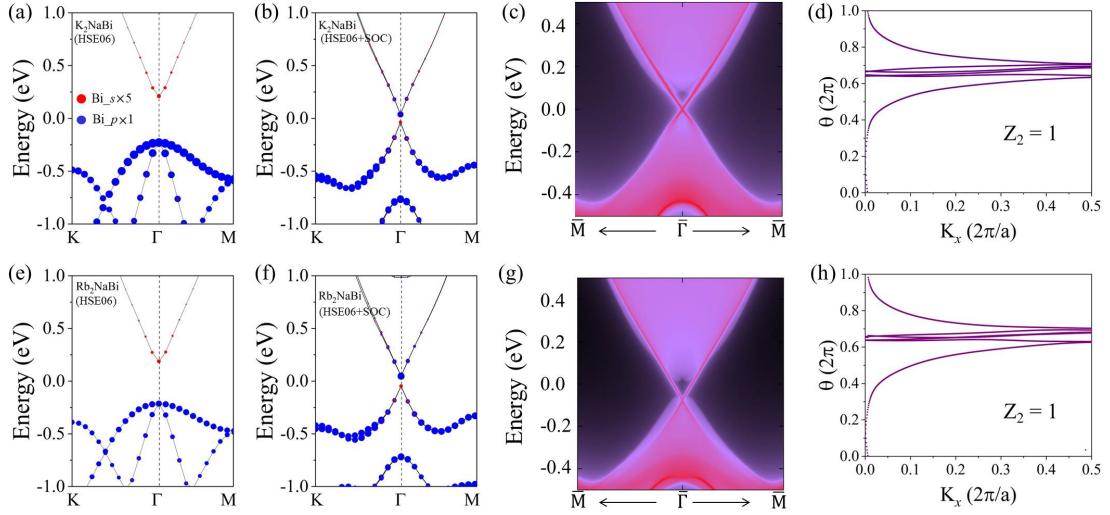

**Fig. S6** The projected band structures of monolayer (a) (b)  $K_2NaBi$  and (e) (f)  $Rb_2NaBi$  from HSE06 and HSE06+SOC, respectively. The red dots represent the contribution from the Bi- $s$  atomic orbitals, and the blue dots represent contribution from the Bi- $p$  atomic orbitals. Band inversion induced by SOC can be clearly observed at the  $\Gamma$  point for both monolayer  $K_2NaBi$  and  $Rb_2NaBi$ , which indicates that both monolayer  $K_2NaBi$  and  $Rb_2NaBi$  are 2D TIs. (c) (g) Projected edge spectra (edge along the  $[010]$  direction) with bulk electronic structure fitted to HSE06+SOC bands, where pairs of  $Z_2$  topological edge states can be observed in the energy gaps.

(d) (h) Calculated Wannier function center evolutions based on HSE06+SOC electronic structure, which indicate a nontrivial  $Z_2$  invariant ( $Z_2 = 1$ ) for both  $K_2NaBi$  and  $Rb_2NaBi$  monolayers.

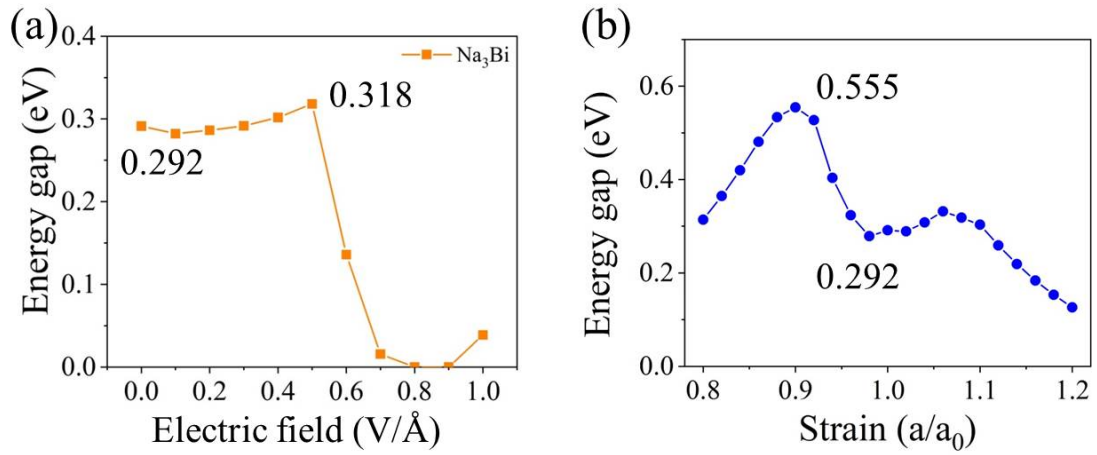

**Fig. S7** The band gaps of  $Na_3Bi$  monolayer as the function of (a) electric field and (b) strain.

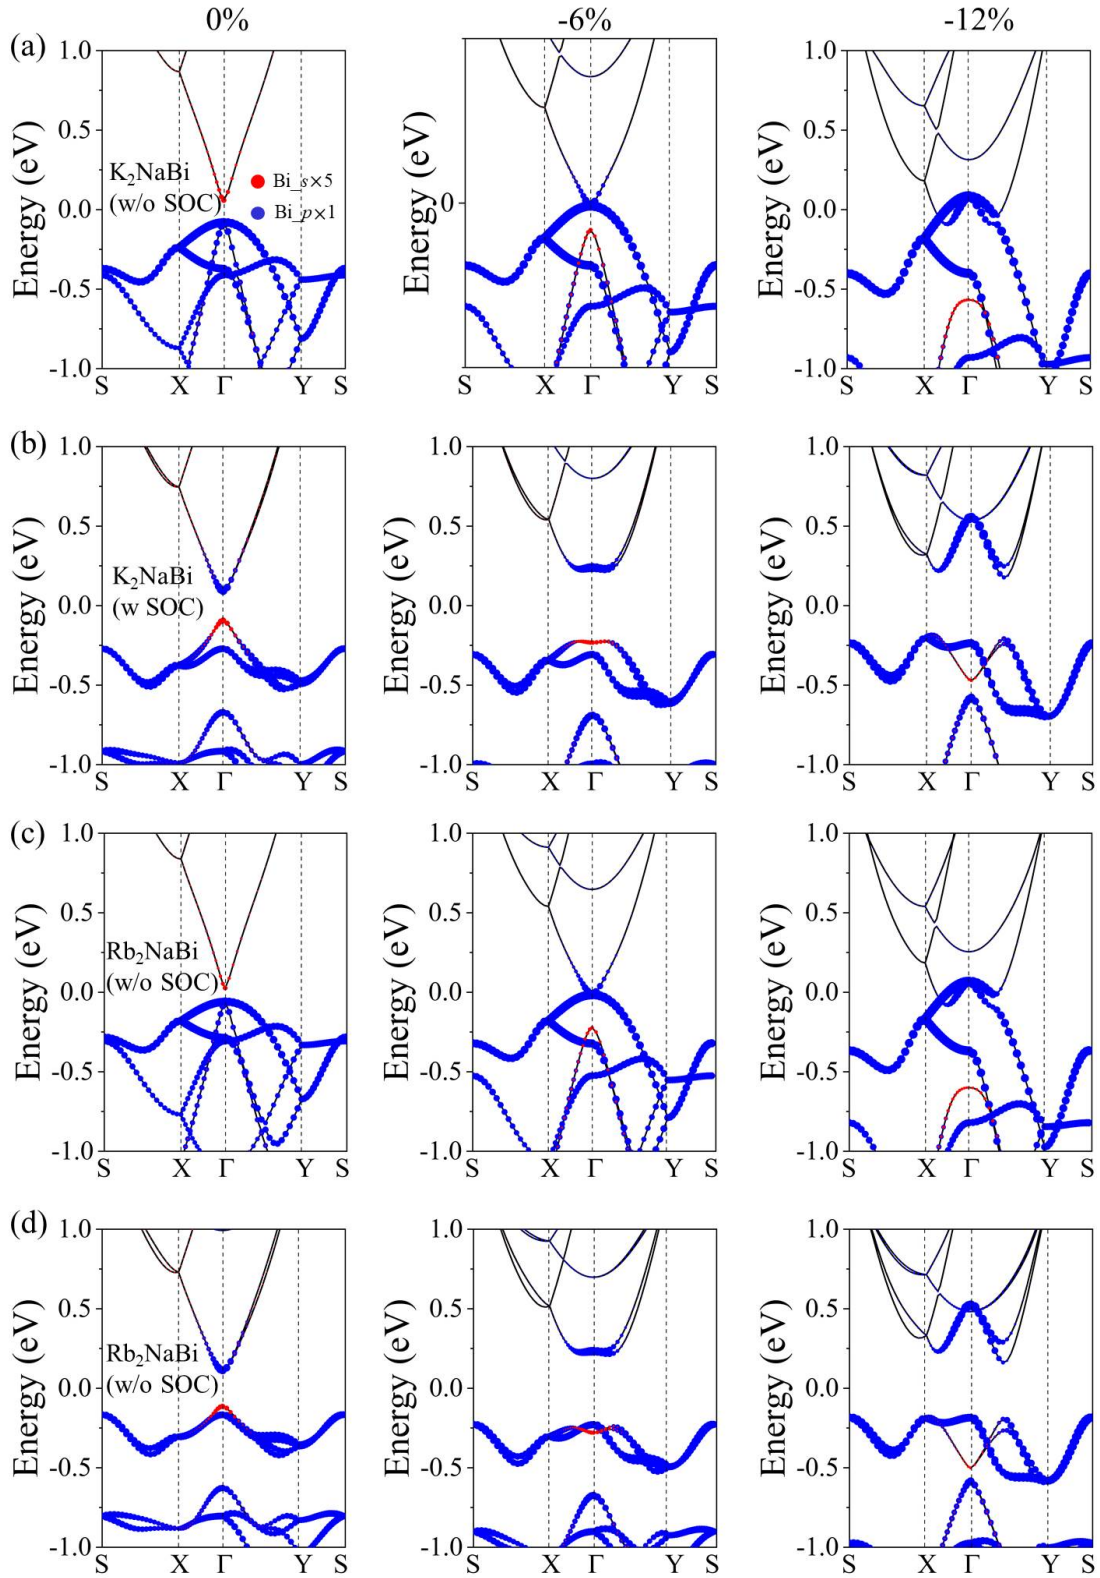

**Fig. S8** The projected band structures of monolayer  $\text{K}_2\text{NaBi}$  ( $\text{Rb}_2\text{NaBi}$ ) under compressive strain from PBE and PBE+SOC calculation.

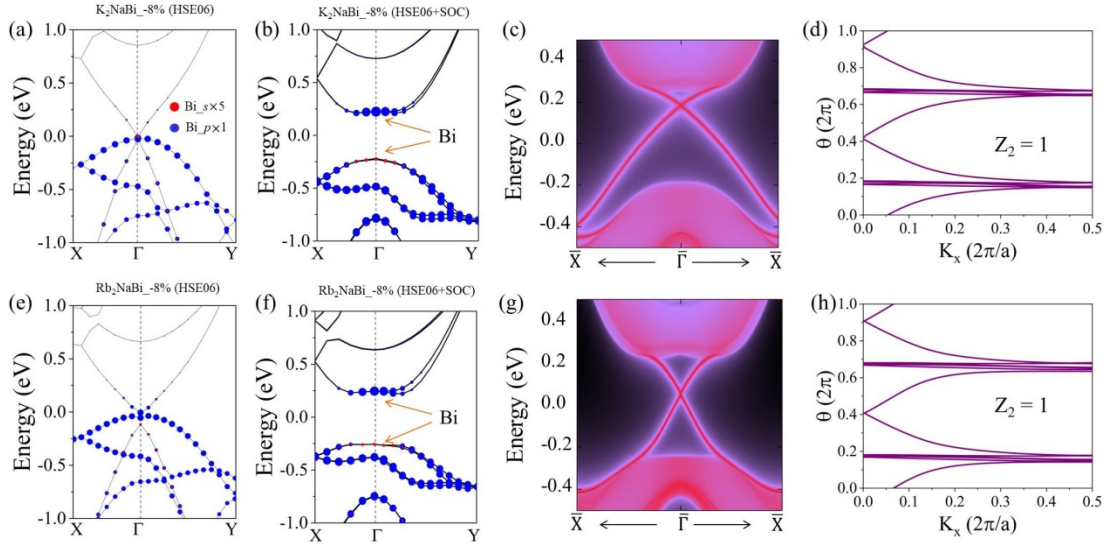

**Fig. S9** The projected band structures of monolayer (a) (b)  $\text{K}_2\text{NaBi}$  and (e) (f)  $\text{Rb}_2\text{NaBi}$  under 8% compressive stress from HSE06 and HSE06+SOC, respectively. Band inversion induced by SOC can be clearly observed at the  $\Gamma$  point for monolayer  $\text{K}_2\text{NaBi}$  and  $\text{Rb}_2\text{NaBi}$  under 8% compressive strain. (c) (g) Projected edge spectra (edge along the [010] direction) with bulk electronic structure fitted to HSE06+SOC bands, where pairs of  $Z_2$  topological edge states can be observed in the energy gaps. (d) (h) Calculated Wannier function center evolutions based on HSE06+SOC electronic structure, which indicate a nontrivial  $Z_2$  invariant ( $Z_2 = 1$ ) for both  $\text{K}_2\text{NaBi}$  and  $\text{Rb}_2\text{NaBi}$  monolayer.
